# Supplementary material for: Early Prediction of Fetal Macrosomia Through Maternal Lipid Profiles
Source: Preprints.org preprint supplement (doi:10.20944/preprints202411.0479.v1), 2024-11-07
Supplement: Supplementary file 1 [file supplementary]

**Table S1.** Clinical Characteristics of the Groups.Bold indicates *p*-values with statistical significance.

| **Parameter** | **Group** | | **Value** | ***P*** | **Value** | ***P*** |
| --- | --- | --- | --- | --- | --- | --- |
| Age, years | GDM+*  (n=30) | Macrosomia+*  (n=7) | 32 (29;35)** | 0.56 | 32(29;36) | 0.73 |
| Macrosomia-*  (n=23) | 32(28;34) |
| GDM-*  (n=80) | Macrosomia+  (n=24) | 31 (28; 34) | 32(29;35) |
| Macrosomia-  (n=56) | 30(28;34) |
| Weight before pregnancy, kg | GDM+  (n=30) | Macrosomia+  (n=7) | 64 (55;77) | 0.13 | 84(66;96) | **0.006** |
| Macrosomia-  (n=23) | 63(55;67) |
| GDM-  (n=80) | Macrosomia+  (n=24) | 60 (55; 25) | 64(58;68) |
| Macrosomia-  (n=56) | 59(54;63) |
| Height, cm | GDM+  (n=30) | Macrosomia+  (n=7) | 168 (164;170) | 0.91 | 170(164;180) | 0.33 |
| Macrosomia-  (n=23) | 168(164;170) |
| GDM-  (n=80) | Macrosomia+  (n=24) | 168 (164; 171) | 169(168;170) |
| Macrosomia-  (n=56) | 167(164;171) |
| Before pregnancy BMI, kg/m2 | GDM+  (n=30) | Macrosomia+  (n=7) | 22.6 (20.1;26.5) | **0.03** | 27(23;30) | **0.006** |
| Macrosomia-  (n=23) | 22(20;24) |
| GDM-  (n=80) | Macrosomia+  (n=24) | 21.2  (19.5; 22.9) | 22(20;26) |
| Macrosomia-  (n=56) | 21(19;22) |
| Weight gain at the time of delivery, kg | GDM+  (n=30) | Macrosomia+  (n=7) | 14 (11;17) | **0.009** | 14(11;16) | **0.002** |
| Macrosomia-  (n=23) | 11(9;14) |
| GDM-  (n=80) | Macrosomia+  (n=24) | 11(9;15) | 16(13;18) |
| Macrosomia-  (n=56) | 13(11;16) |
| Patient’s newborn weight, kg | GDM+  (n=30) | Macrosomia+  (n=7) | 3.5 (3.2;3.8) | 0.86 | 3.6(3.5;4.1) | **0.004** |
| Macrosomia-  (n=23) | 3.5 (3.2;3.7) | 3.5(3.2;3.6) |
| GDM-  (n=80) | Macrosomia+  (n=24) | 3.8(3.5;4.1) |
| Macrosomia-  (n=56) | 3.4(3.1;3.6) |
| Husband’s newborn weight, kg | GDM+  (n=30) | Macrosomia+  (n=7) | 3.6 (3.4;3.9) | 0.78 | 3.6(3.5;3.8) | 0.13 |
| Macrosomia-  (n=23) | 3.6(3.4;4) |
| GDM-  (n=80) | Macrosomia+  (n=24) | 3.6 (3.4;3.9) | 3.8(3.6;4) |
| Macrosomia-  (n=56) | 3.5(3.3;3.8) |
| The first-birth, number of patients (%) | GDM+  (n=30) | Macrosomia+  (n=7) | 13 (43%) | 0.67 | 2 (29%) | 0.90 |
| Macrosomia-  (n=23) | 10 (43%) |
| GDM-  (n=80) | Macrosomia+  (n=24) | 30 (38%) | 9 (38%) |
| Macrosomia-  (n=56) | 21 (38%) |
| Gestational age at delivery, weeks | GDM+  (n=30) | Macrosomia+  (n=7) | 39.0 (38.4;39.6) | 0.17 | 40(39;40) | 0.05 |
| Macrosomia-  (n=23) | 39(38;40) |
| GDM-  (n=80) | Macrosomia+  (n=24) | 39.5  (38.4;40.2) | 40(39;40) |
| Macrosomia-  (n=56) | 39(38;40) |
| Cesarean delivery, number of patients (%) | GDM+  (n=30) | Macrosomia+  (n=7) | 18 (60%) | **0.02** | 5 (71%) | **0.003** |
| Macrosomia-  (n=23) | 13 (56%) |
| GDM-  (n=80) | Macrosomia+  (n=24) | 27 (34%) | 14 (58%) |
| Macrosomia-  (n=56) | 13 (23%) |
| Scheduled cesarean delivery, number of patients (%) | GDM+  (n=30) | Macrosomia+  (n=7) | 13 (43%) | **0.01** | 4 (57%) | **0.003** |
| Macrosomia-  (n=23) | 9 (39%) |
| GDM-  (n=80) | Macrosomia+  (n=24) | 14 (18%) | 6 (25%) |
| Macrosomia-  (n=56) | 8 (14%) |
| Length of maternal hospital stay, days | GDM+  (n=30) | Macrosomia+  (n=7) | 5(3;5) | **0.02** | 5(3;5) | **0.007** |
| Macrosomia-  (n=23) | 5(4;5) |
| GDM-  (n=80) | Macrosomia+  (n=24) | 4(3;5) | 4(4;5) |
| Macrosomia-  (n=56) | 3(3;4) |
| Newborn weight, grams | GDM+  (n=30) | Macrosomia+  (n=7) | 3398  (3202;3873) | 0.42 | 4200  (4082;4295) | **p< 0.001** |
| Macrosomia-  (n=23) | 3250  (3150;3590) |
| GDM-  (n=80) | Macrosomia+  (n=24) | 3495  (3207;4032) | 4114  (4060;4244) |
| Macrosomia-  (n=56) | 3368  (3178;3538) |
| Apgar score at 1 minute | GDM+  (n=30) | Macrosomia+  (n=7) | 8(8;8) | 0.53 | 8(8;8) | 0.72 |
| Macrosomia-  (n=23) | 8(8;8) |
| GDM-  (n=80) | Macrosomia+  (n=24) | 8(8;8) | 8(8;8) |
| Macrosomia-  (n=56) | 8(8;8) |
| Apgar score at 5 minutes | GDM+  (n=30) | Macrosomia+  (n=7) | 9(9;9) | 0.74 | 9(9;9) | 0.46 |
| Macrosomia-  (n=23) | 9(9;9) |
| GDM-  (n=80) | Macrosomia+  (n=24) | 9(9;9) | 9(9;9) |
| Macrosomia-  (n=56) | 9(9;9) |
| Length of newborn hospital stay, days | GDM+  (n=30) | Macrosomia+  (n=7) | 4(3;5) | 0.15 | 4(4;5) | **0.009** |
| Macrosomia-  (n=23) | 3(3;5) |
| GDM-  (n=80) | Macrosomia+  (n=24) | 3(3;4) | 4(3;5) |
| Macrosomia-  (n=56) | 3(3;4) |

* GDM+/ GDM- - the groups with/without gestational diabetes mellitus; Macrosomia+/ Macrosomia- - the subgroups with/without macrosomia.

** the data are presented as M(Q1;Q3), where M is the median, Q1 and Q3 are the first and third quantiles.
